# Supplementary material
Source: PubMed Central journal article supplement (PMC4719165)
Supplement: supp_kwq234_kwq234_table_1.pdf [file supp_kwq234_kwq234_table_1.pdf]

Web Table. Other GWAS on the same Phenotype

| Ref  | Disease/ Trait        | PMIDs of GWAS published before                                       | PMIDs of GWAS published concurrently | PMIDs of GWAS published afterwards                         |
|------|-----------------------|----------------------------------------------------------------------|--------------------------------------|------------------------------------------------------------|
| (1)  | ALL                   | None                                                                 | 19684604                             |                                                            |
| (2)  | AIDS progression      | 17641165                                                             | None                                 | 19754311                                                   |
| (3)  | Blue vs. green eyes   | None                                                                 | None                                 | 18488028, 18252221                                         |
| (4)  | Cognitive performance | 17903297, 17903297, 18067574                                         | None                                 | None                                                       |
| (5)  | BMD (lumbar spine)    | 19249006, 19181680, 18455228, 17903296, 18445777, 19079262           | 19874204                             | None                                                       |
| (6)  | Crohn's disease       | 17435756, 17447842, 17554261, 17554300, 17068223                     | None                                 | 18587394, 17804789, 18758464, 18723019                     |
| (7)  | Crohn's disease       | 17804789, 17684544, 17554300, 17554261, 17447842, 17435756, 17068223 | 18723019                             | 18758464,                                                  |
| (3)  | Freckles              | None                                                                 | None                                 | None                                                       |
| (8)  | HDL cholesterol       | 18193043, 18193044, 19802338, 17903299, 18179892, 18193046, 17463246 | 19060911, 19060910, 19074352         | 19359809                                                   |
| (9)  | HDL cholesterol       | 17463246, 17903299                                                   | 18193044, 18193043, 18179892         | 19060911, 19060906, 19802338, 19074352, 19060910, 19359809 |
| (10) | Hematocrit            | 17903294                                                             |                                      | None                                                       |
|      | Hemoglobin            | 17903294                                                             | 19820698, 19820697                   | None                                                       |
| (11) | LDL cholesterol       | 17903299, 17463246                                                   | 18193043, 18179892                   | 19060911, 19060910,                                        |

|      |                                                                 |                                                                      |                              |                                                                                |
|------|-----------------------------------------------------------------|----------------------------------------------------------------------|------------------------------|--------------------------------------------------------------------------------|
|      |                                                                 |                                                                      |                              | 19060906, 18802019, 18262040, 19802338, 19074352                               |
| (10) | MCH                                                             | 17903294                                                             | 19820698, 19820697           | None                                                                           |
| (12) | MCV                                                             | 17903294                                                             | 19820698, 19862010           | None                                                                           |
| (13) | Nasopharyngeal carcinoma                                        | None                                                                 | None                         | 19664746                                                                       |
| (14) | NSCL                                                            | 19270707                                                             | None                         | None                                                                           |
| (15) | Panic disorder                                                  | None                                                                 | None                         | None                                                                           |
|      |                                                                 | None                                                                 | None                         | None                                                                           |
| (16) | Prostate cancer                                                 | None                                                                 | 17401363                     | 19767754, 19117981, 18264098, 18264097, 18264096, 18073375, 17903305, 17603485 |
| (17) | Primary biliary cirrhosis                                       | None                                                                 | None                         | None                                                                           |
| (18) | ALP                                                             | None                                                                 | None                         | 18940312                                                                       |
|      | fT3                                                             | None                                                                 | None                         | None                                                                           |
| (19) | Psoriasis                                                       | 18364390                                                             |                              | 19169255, 19169254                                                             |
| (20) | Response to antipsychotic therapy (extrapyramidal side effects) | 19721433, 19680635, 18521090, 18521091                               | None                         | None                                                                           |
|      |                                                                 | 19721433, 19680635, 18521090, 18521091                               | None                         | None                                                                           |
| (21) | Response to treatment for ALL                                   | None                                                                 | None                         | None                                                                           |
| (22) | SLE                                                             | 18204447, 18204446, 18204098                                         | None                         | 19838193                                                                       |
| (23) | SLE                                                             | 19165918, 18204447, 18204446, 18204098                               | None                         | None                                                                           |
| (24) | Tanning                                                         | 17952075, 18488028                                                   |                              |                                                                                |
| (25) | Triglycerides                                                   | 17903299, 17463246                                                   | 18193044, 18193046, 18179892 | 19060911, 19060910, 19060906, 19802338, 19074352                               |
| (26) | Triglycerides                                                   | 18193043, 18193044, 19802338, 17903299, 18179892, 18193046, 17463246 | 19060911, 19060910, 19060906 |                                                                                |
| (27) | Type 1 diabetes                                                 | 18978792, 18840781, 18198356, 17632545, 17554300, 17554260           | None                         | None                                                                           |
| (28) | Type 2 diabetes                                                 | 19056611, 18711367, 18711366, 18372903, 17846126, 17846125,          | None                         | 19734900                                                                       |

|  |  |                                                                                                                             |  |  |
|--|--|-----------------------------------------------------------------------------------------------------------------------------|--|--|
|  |  | 17846124, 17668382,<br>17554300, 17463249,<br>17463248, 17463246,<br>17460697, 17293876,<br>17903298, 17848626,<br>17603485 |  |  |
|--|--|-----------------------------------------------------------------------------------------------------------------------------|--|--|

Abbreviations: ALL, acute lymphoblastic leukaemia; ALP alkaline phosphatase; BMD, bone mineral density; FT3, free triiodothyronine; MCH, mean corpuscular hemoglobin; MCV, mean corpuscular volume; NSCL, nonsyndromic cleft lip with or without cleft palate; SLE, systemic lupus erythematosus

(I), Risk variants were imputed rather than directly genotyped.

## References

1. Trevino LR, Yang W, French D, et al. Germline genomic variants associated with childhood acute lymphoblastic leukemia. *Nat Genet.* 2009;41(9):1001-1005.
2. Limou S, Le Clerc S, Coulonges C, et al. Genomewide association study of an AIDS-nonprogression cohort emphasizes the role played by HLA genes (ANRS Genomewide Association Study 02). *J Infect Dis.* 1 2009;199(3):419-426.
3. Sulem P, Gudbjartsson DF, Stacey SN, et al. Genetic determinants of hair, eye and skin pigmentation in Europeans. *Nat Genet.* 2007;39(12):1443-1452.
4. Need AC, Attix DK, McEvoy JM, et al. A genome-wide study of common SNPs and CNVs in cognitive performance in the CANTAB. *Hum Mol Genet.* 1 2009;18(23):4650-4661.
5. Rivadeneira F, Styrkarsdottir U, Estrada K, et al. Twenty bone-mineral-density loci identified by large-scale meta-analysis of genome-wide association studies. *Nat Genet.* 2009;41(11):1199-1206.

6. Franke A, Hampe J, Rosenstiel P, et al. Systematic association mapping identifies NELL1 as a novel IBD disease gene. *PLoS One*. 2007;2(1):e691.
7. Barrett JC, Hansoul S, Nicolae DL, et al. Genome-wide association defines more than 30 distinct susceptibility loci for Crohn's disease. *Nat Genet*. 2008;40(8):955-962.
8. Kathiresan S, Willer CJ, Peloso GM, et al. Common variants at 30 loci contribute to polygenic dyslipidemia. *Nat Genet*. 2009;41(1):56-65.
9. Kooner JS, Chambers JC, Aguilar-Salinas CA, et al. Genome-wide scan identifies variation in MLXIPL associated with plasma triglycerides. *Nat Genet*. 2008;40(2):149-151.
10. Ganesh SK, Zakai NA, van Rooij FJ, et al. Multiple loci influence erythrocyte phenotypes in the CHARGE Consortium. *Nat Genet*. 2009;41(11):1191-1198.
11. Kathiresan S, Melander O, Guiducci C, et al. Six new loci associated with blood low-density lipoprotein cholesterol, high-density lipoprotein cholesterol or triglycerides in humans. *Nat Genet*. 2008;40(2):189-197.
12. Soranzo N, Spector TD, Mangino M, et al. A genome-wide meta-analysis identifies 22 loci associated with eight hematological parameters in the HaemGen consortium. *Nat Genet*. 2009;41(11):1182-1190.
13. Ng CC, Yew PY, Puah SM, et al. A genome-wide association study identifies ITGA9 conferring risk of nasopharyngeal carcinoma. *J Hum Genet*. 2009;54(7):392-397.

14. Grant SF, Wang K, Zhang H, et al. A genome-wide association study identifies a locus for nonsyndromic cleft lip with or without cleft palate on 8q24. *J Pediatr.* 2009;155(6):909-913.
15. Otowa T, Yoshida E, Sugaya N, et al. Genome-wide association study of panic disorder in the Japanese population. *J Hum Genet.* 2009;54(2):122-126.
16. Gudmundsson J, Sulem P, Manolescu A, et al. Genome-wide association study identifies a second prostate cancer susceptibility variant at 8q24. *Nat Genet.* 2007;39(5):631-637.
17. Hirschfield GM, Liu X, Xu C, et al. Primary biliary cirrhosis associated with HLA, IL12A, and IL12RB2 variants. *N Engl J Med.* 11 2009;360(24):2544-2555.
18. Melzer D, Perry JR, Hernandez D, et al. A genome-wide association study identifies protein quantitative trait loci (pQTLs). *PLoS Genet.* 2008;4(5):e1000072.
19. Liu Y, Helms C, Liao W, et al. A genome-wide association study of psoriasis and psoriatic arthritis identifies new disease loci. *PLoS Genet.* 2008;4(3):e1000041.
20. Aberg K, Adkins DE, Bukszar J, et al. Genomewide association study of movement-related adverse antipsychotic effects. *Biol Psychiatry.* 1;67(3):279-282.
21. Yang JJ, Cheng C, Yang W, et al. Genome-wide interrogation of germline genetic variation associated with treatment response in childhood acute lymphoblastic leukemia. *JAMA.* 28 2009;301(4):393-403.

22. Han JW, Zheng HF, Cui Y, et al. Genome-wide association study in a Chinese Han population identifies nine new susceptibility loci for systemic lupus erythematosus. *Nat Genet.* 2009;41(11):1234-1237.
23. Graham RR, Cotsapas C, Davies L, et al. Genetic variants near TNFAIP3 on 6q23 are associated with systemic lupus erythematosus. *Nat Genet.* 2008;40(9):1059-1061.
24. Nan H, Kraft P, Qureshi AA, et al. Genome-wide association study of tanning phenotype in a population of European ancestry. *J Invest Dermatol.* 2009;129(9):2250-2257.
25. Willer CJ, Sanna S, Jackson AU, et al. Newly identified loci that influence lipid concentrations and risk of coronary artery disease. *Nat Genet.* 2008;40(2):161-169.
26. Pollin TI, Damcott CM, Shen H, et al. A null mutation in human APOC3 confers a favorable plasma lipid profile and apparent cardioprotection. *Science.* 12 2008;322(5908):1702-1705.
27. Barrett JC, Clayton DG, Concannon P, et al. Genome-wide association study and meta-analysis find that over 40 loci affect risk of type 1 diabetes. *Nat Genet.* 10 2009.
28. Takeuchi F, Serizawa M, Yamamoto K, et al. Confirmation of multiple risk Loci and genetic impacts by a genome-wide association study of type 2 diabetes in the Japanese population. *Diabetes.* 2009;58(7):1690-1699.
